1           **An ultrapotent RBD-targeted biparatopic nanobody**  
2                           **neutralizes broad SARS-CoV-2 variants**

3  
4   Xiaojing Chi<sup>1,#</sup>, Xinhui Zhang<sup>1,#</sup>, Shengnan Pan<sup>1,#</sup>, Yanying Yu<sup>2,#</sup>, Tianli Lin<sup>1</sup>, Huarui  
5       Duan<sup>1</sup>, Xiuying Liu<sup>1</sup>, Wenfang Chen<sup>1</sup>, Xuehua Yang<sup>1</sup>, Qiang Ding<sup>2,\*</sup>, Jianwei  
6                           Wang<sup>1,\*</sup>, Wei Yang<sup>1,3,\*</sup>

7  
8   <sup>1</sup> NHC Key Laboratory of Systems Biology of Pathogens, Institute of Pathogen Biology,  
9   Chinese Academy of Medical Sciences & Peking Union Medical College,  
10   Beijing100176, China

11   <sup>2</sup> School of Medicine, Tsinghua University, Beijing 100084, China.

12   # These authors contributed equally to this work.

13   \* Corresponding author: W.Y. (wyang@ipb.pumc.edu.cn),

14                           J.W. (wangjw28@163.com)

15                           Q.D. (qding@tsinghua.edu.cn)

16  
17   <sup>3</sup> Lead contact

18

19

20

21 **Abstract**

22 The wide transmission and host adaptation of SARS-CoV-2 have led to the rapid  
23 accumulation of mutations, posing significant challenges to the effectiveness of  
24 vaccines and therapeutic antibodies. Although several neutralizing antibodies were  
25 authorized for emergency clinical use, convalescent patients derived natural antibodies  
26 are vulnerable to SARS-CoV-2 Spike mutation. Here, we describe the screen of a panel  
27 of SARS-CoV-2 receptor-binding domain (RBD) targeted nanobodies (Nbs) from a  
28 synthetic library and the design of a biparatopic Nb, named Nb1-Nb2, with tight affinity  
29 and super wide neutralization breadth against multiple SARS-CoV-2 variants of  
30 concern. Deep-mutational scanning experiments identify the potential binding epitopes  
31 of the Nbs on the RBD and demonstrate that biparatopic Nb1-Nb2 has a strong escape  
32 resistant feature against more than 60 tested RBD amino acid substitutions. Using  
33 pseudovirion-based and trans-complementation SARS-CoV-2 tools, we determine that  
34 the Nb1-Nb2 broadly neutralizes multiple SARS-CoV-2 variants, including Alpha  
35 (B.1.1.7), Beta (B.1.351), Gamma (P.1), Delta (B.1.617.2), Lambda (C.37), Kappa  
36 (B.1.617.1) and Mu (B.1.621). Furthermore, a heavy chain antibody is constructed by  
37 fusing the human IgG1 Fc to Nb1-Nb2 (designated as Nb1-Nb2-Fc) to improve its  
38 neutralization potency, yield, stability and potential half-life extension. For the new  
39 Omicron variant (B.1.1.529) that harbors unprecedented multiple RBD mutations, Nb1-  
40 Nb2-Fc keeps a firm affinity ( $KD < 1.0 \times 10^{-12}$  M) and strong neutralizing activity ( $IC_{50}$   
41 = 0.0017 nM). Together, we developed a tetravalent biparatopic human heavy chain  
42 antibody with ultrapotent and broad-spectrum SARS-CoV-2 neutralization activity  
43 which highlights the potential clinical applications.

44

45 **Keywords:** COVID-19, coronavirus, Omicron, variants of concern, heavy chain  
46 antibody, broad neutralization

47

48

## 49 **Introduction**

50 The current emerging severe acute respiratory syndrome coronavirus 2 (SARS-CoV-2)  
51 causes global pandemic and the coronavirus disease (COVID-19) related deaths had  
52 exceeded 5.3 million in December 2021<sup>1,2</sup>. The continuing circulation and evolution of  
53 SARS-CoV-2 in human and susceptible animals pose a huge challenge to public health  
54 and social interaction<sup>3,4</sup>. Clinical manifestations of COVID-19 in the general population  
55 range from asymptomatic infection, fever, dry cough, loss of taste or smell to severe  
56 pneumonia, multi-organ failure, and death<sup>1,5</sup>. Progress has been made in SARS-CoV-2  
57 small molecule direct antiviral agents by targeting viral RNA-dependent RNA  
58 polymerase and main protease (3CL pro)<sup>6-8</sup>. Nevertheless, potent and specific antivirals  
59 targeting diverse mechanisms for either prevention or therapy are still urgently needed  
60 in the context of a pandemic.

61 Prophylactic vaccines against SARS-CoV-2 were developed from the multiple  
62 technology routes<sup>9-11</sup>, with a major purpose to elicit neutralizing antibodies. However,  
63 vaccines are unable to protect individuals with low immunity, autoimmune diseases,  
64 and low vaccination willingness. The emergency use authorization (EUA) has been  
65 issued for clinical utility of neutralizing antibodies to treat certain COVID-19  
66 patients<sup>12,13</sup>. As the critical function for binding to the host receptor ACE2 and cell  
67 entry<sup>14</sup>, the receptor-binding domain (RBD) on SARS-CoV-2 Spike protein is the most  
68 preferred antigen target for neutralizing antibody-based countermeasures<sup>15-17</sup>. The  
69 antigenic landscape of the SARS-CoV-2 RBD can be divided into seven binding  
70 communities, including the receptor binding motif (RBM), the outer face of the RBD,  
71 and the inner face of the RBD<sup>18</sup>. Neutralizing antibodies binding to RBM provide the  
72 most potent activity, while neutralizing antibodies associated with the outer face of the  
73 RBD demonstrate excellent neutralization breadth<sup>18</sup>.

74 The SARS-CoV-2 is constantly evolving and has accumulated many mutations across  
75 its genome, especially within the Spike gene<sup>19</sup>. Distinct variants of concern (VOC) or  
76 variants of interest (VOI), such as Alpha (B.1.1.7), Beta (B.1.351), Gamma (P.1), Delta

77 (B.1.617.2) and Omicron (B.1.1.529), are associated with enhancement of virus  
78 transmission and jeopardize neutralizing antibody activities through potential  
79 diminished or loss of binding<sup>20,21</sup>. The desired neutralizing antibodies require a difficult  
80 balance between neutralizing potency and broad-spectrum. This is why the majority of  
81 clinical monoclonal antibodies adopt antibody pairs that recognize two or more distinct  
82 Spike epitopes, known as “cocktails” strategy. For all this, any single monoclonal  
83 antibody has to face the risk of viral escape.

84 A VHH antibody, also known as nanobody (Nb), is the antigen binding fragment from  
85 camelid or shark heavy chain antibody, which is the smallest antibody fragment with  
86 antigen affinity<sup>22,23</sup>. Nb alone is about 12-15 KDa, and composed of four conserved  
87 framework regions (FRs) and three hypervariable complementarity-determining  
88 regions (CDRs). Nb has unique biological and physical features, including low  
89 manufacturing cost, prominent stability, adjustable half-life, alternative routes of  
90 administration, and prone to synthesizing the homo/hetero multimers from diverse  
91 functional Nb building blocks<sup>24</sup>. Evidence suggests that Nbs can exhibit super-strong  
92 activity and a broad binding spectrum, through combining different Nbs into a new  
93 polyvalent molecule<sup>25</sup>. Therefore, Nbs are becoming a powerful weapon against viral  
94 diseases.

95 In this study, we obtain several SARS-CoV-2 RBD targeting Nbs with either high-  
96 affinity or broad neutralization spectrum using a previously developed synthetic  
97 nanobody discovery platform<sup>10</sup>. We identified a biparatopic Nb as the best in class  
98 broadly neutralizing antibody, which can potently neutralize more than 60 SARS-CoV-  
99 2 Spike pseudotyped viruses bearing single point, combination, and deletion mutations,  
100 as well as multiple VOC and VOI, including the new super mutant Omicron variant.  
101 Collectively, our study has characterized a single antibody, rather than a cocktail of  
102 antibodies, with ultra-broad RBD coverage which significantly reduces its risk of viral  
103 escape and provides an alternative for optimizing COVID-19 prophylactic and  
104 therapeutic antivirals.

## 105 **Results**

### 106 **Selection and design of neutralizing Nbs with potent activity and affinity.**

107 The unceasing accumulation of mutations in the SARS-CoV-2 Spike causes the loss of  
108 efficacy for some established neutralizing antibodies<sup>26</sup>. Iterative discovery and  
109 identification of neutralizing antibodies against emerging variants will provide a solid  
110 stockpile for global pandemic solutions. To isolate Nbs with potential neutralization  
111 breadth, recombinant RBD antigens from strains P.1 (isolated from Brazil) and B.1.617  
112 (isolated from India) were used to screen a fully synthetic and highly diversified Nb  
113 phage display library<sup>27</sup>. After four rounds of reciprocal biopanning and phage ELISA,  
114 a panel of Nb binders was obtained. Total 18 Nbs were expressed in *Escherichia coli*  
115 and purified with one-step nickel affinity chromatography (Fig. 1a). The sequences of  
116 Nb complementary determining regions are listed in Table S1. To evaluate the  
117 neutralization breadth of these discovered Nbs, Spike-pseudotyped particle infection  
118 assay from four SARS-CoV-2 variants (B.1.1.7, B.1.341, P.1 and B.1.617) was  
119 performed. Encouragingly, several Nbs (Nb1, Nb2 and Nb15) demonstrated cross-  
120 protective activity at 0.33  $\mu$ M, and each of them acted with a unique neutralization  
121 spectrum similarly or complementally (Fig. 1b). Thermal stability analysis showed that  
122 the T<sub>m</sub> values range from 59.1 to 82.3 °C, with most of them above 70 °C (Fig. 1b).

123 Nb multimerization strategy can dramatically enhance the affinity and neutralization  
124 potency<sup>28</sup>. Thus, we designed a panel of homo- and hetero-dimeric Nbs by C- to N-  
125 terminus fusion expression with a flexible (GGGGS)<sub>5</sub> linker sequence. Three Nbs (Nb1,  
126 Nb2 and Nb15) with relatively broad neutralization spectrum were chose as monomeric  
127 building blocks (Fig. 1c). Most bivalent Nbs showed improved neutralization activity  
128 against Delta variant-derived pseudovirus (Fig. 1d). Inspiringly, we found up to 15-79-  
129 fold activity increase for the heterodimer Nb1-Nb2 (IC<sub>50</sub> =0.0036 nM) compared with  
130 the respective monomers (Fig. 1d & 1e). This enhanced neutralization potency could  
131 not be achieved by simply “cocktail” mixture formula of two monomers (Fig. 1f),  
132 suggesting a unique avidity binding mechanism to the trimeric spike.

133 We further determined the equilibrium-binding affinity (KD) of the monovalent and  
134 bivalent Nbs by BLI using multiple VOC derived RBD recombinant proteins, including  
135 the wild type of Wuhan isolate, Alpha (B.1.1.7, N501Y), Beta (B.1.351, K417N, E484K,  
136 N501Y), Gamma (P.1, L18F, K417T, E484K), Delta (B.1.617.2, L452R, T478K) and  
137 Kappa (B.1.617.1, L452R, E484Q) variants (Fig. 2). Nb1 bound to all VOC RBDs with  
138 a wide KD ranging from 4.4 to <0.001 nM. However, Nb2 showed selective affinity to  
139 wild type, Alpha, Delta, and Kappa RBDs with KD from 7.8-0.37 nM, but escaped from  
140 binding with Beta and Gamma RBDs. Through fusion connection, the bivalent Nb1-  
141 Nb2 demonstrated high affinity (less than or near 0.001 nM) to all RBDs (Fig. 2). These  
142 findings reveal that the bivalent format of Nb1 and Nb2 enhances the strength and  
143 breadth of its affinity to RBDs.

#### 144 **Epitope mapping using naturally occurring Spike mutants**

145 SARS-CoV-2 will continue to evolve. SARS-CoV-2 Spike mutations, particularly in  
146 the RBD region, are strongly associated with the escape of antibody-mediated  
147 neutralization<sup>29</sup>. Currently, near a hundred mutation sites were found in Spike from the  
148 circulating SARS-CoV-2 isolates database GISAID<sup>30</sup>. The mutations in RBD,  
149 particularly in RBM, played critical roles for the increased transmission capability and  
150 neutralizing antibody resistance. To intensively analyze the effect of these mutations on  
151 the Nb neutralization potency, spike genes containing point mutations or deletions were  
152 generated and SARS-CoV-2 pseudoviruses were packaged. All the mutated  
153 pseudoviruses had a basic D614G substitution and the relative neutralization fold  
154 change to D614G was analyzed (Fig. 3a). For the Nb1 monomer, varying degrees of  
155 resistance were observed in a large proportion of mutant pseudoviruses, in which  
156 complete loss of neutralization was documented in the single point mutations A348S,  
157 N354D and T393P. Decreases more than 100-fold also included E471Q, E484K/Q,  
158 L452R/P681R and P681R/L452R/E484Q (Fig. 3a). A better situation happened with  
159 Nb2 monomer. The increased and decreased neutralization activities within 10-fold  
160 were evenly distributed among the tested mutations, though Nb2 suffered a complete  
161 loss of neutralization activity against N439K, E484K/Q as well as K417N (Fig. 3a). In

162 general, the effect of mutations outside the RBD on the neutralization activity of the  
163 monomeric Nbs is less than that inside the RBD region. However, in sharp contrast, the  
164 bivalent Nb1-Nb2 exhibited an incredible neutralization spectrum width and enhanced  
165 potency. Among 64 mutated constructs, neutralization potency of Nb1-Nb2 was  
166 enhanced (2 to > 10-fold) in 46 of them, and a slight reduction (< 10-fold) was observed  
167 only in 15 mutants (Fig. 3a). The IC<sub>50</sub> against various mutant pseudoviruses was  
168 summarized in Fig. 3b. These data imply that neutralizing antibodies with escape  
169 resistance can be designed by fusing two or more diverse Nbs.

170 Based on the above mutation analysis, we predicted the possible RBD epitopes for Nb1  
171 and Nb2 by mapping the resistant hot spots on the surface of SARS-CoV-2 RBD (Fig.  
172 3c). Currently, a consortium has been formed to define seven RBD communities (RBD-  
173 1 through RBD-7) that are bound by discovered neutralizing antibodies worldwide<sup>18</sup>.  
174 The antibodies in RBD-1 to RBD-3 target the top surface, namely RBM, and compete  
175 with ACE2. In comparison, antibodies in communities RBD-4/5 and RBD-6/7 bind to  
176 the outer and inner face of the RBD, respectively. Selecting antibodies for therapeutic  
177 cocktails benefits from this classification criteria. Interestingly, our prediction suggests  
178 that Nb1 recognizes an atypical RBD-4/5 mode with amino acids 348A/354N/393T as  
179 significant landmarks and 452E/471E/484E as potential influence sites (Fig. 3c). Nb2  
180 adopts an approximate RBD-1/2/3 feature with amino acids 439N/484E/406E/417K as  
181 critical interaction points (Fig. 3c). The predicted binding sites of the two Nbs are both  
182 overlapping and separated, suggesting the RBD binding area could be enlarged through  
183 bivalent fusion of Nb1 and Nb2. To determine the neutralization mechanism,  
184 recombinant SARS-CoV-2 RBD was first immobilized on an AR2G biosensor and then  
185 saturated with ACE2. The addition of Nb1 or Nb2 to ACE2-saturated probe showed no  
186 complementary binding (Fig. 3d), which indicates that Nb1 or Nb2 have direct  
187 competition with ACE2 for binding to the SARS-CoV-2 RBD.

### 188 **Neutralization activity against multiple SARS-CoV-2 variants**

189 As the SARS-CoV-2 continues to adapt and evolve in the human population, the

190 dominant variants are also changing. To explore and compare the efficacy of the Nbs  
191 for neutralization of SARS-CoV-2 VOC, we first performed lentivirus-based  
192 pseudovirus infection assays. Seven pseudoviruses was produced to represent four  
193 VOC (Alpha, B.1.1.7; Beta, B.1.351; Gamma, P.1 and Delta, B.1.617.2) and three VOI  
194 (Lambda, C.37; Kappa, B.617.1 and Mu, B.621;). We found that bivalent Nb1-Nb2  
195 broadly neutralized all pseudoviral variants with low IC<sub>50</sub>, ranging from 0.003 to 0.0865  
196 nM (Fig. 4a & Fig. S1). However, the monomeric Nbs showed much lower activities,  
197 even loss of activity for Nb1 against Delta and Nb2 against Beta (Fig. 4a). These  
198 neutralization results were basically consistent with the affinity data (Fig. 2). Generally,  
199 monomeric Nbs provide a basic affinity and keep low activity. By designing a flexible  
200 bivalent strategy, the biparatopic Nb1-Nb2 can target two independent RBD epitopes  
201 and prevent or minimize viral escape.

202 Neutralization assay of live SARS-CoV-2 (SARS-CoV-2 GFP/ $\Delta$ N trVLP) that was  
203 constructed by reverse genetics was also performed (Fig. 4b)<sup>31</sup>. Bivalent Nb1-Nb2  
204 neutralized wild type (WT) Wuhan strain SARS-CoV-2 GFP/ $\Delta$ N trVLP with IC<sub>50</sub> of  
205 1.207 nM (0.036  $\mu$ g/mL), and it had comparable activities to neutralize Alpha, Beta,  
206 Gamma and Delta live virus variants, with the IC<sub>50</sub> around 0.8149 nM (0.024  
207  $\mu$ g/mL), 1.776 nM (0.054  $\mu$ g/mL), 13.01 nM (0.390  $\mu$ g/mL) and 0.7317 nM (0.022  
208  $\mu$ g/mL). Although the measured IC<sub>50</sub> concentration in SARS-CoV-2 GFP/ $\Delta$ N trVLP is  
209 higher than that in pseudovirus system, which may be due to sensitivity differences  
210 between the two virological tools, the trend of its broad-spectrum neutralizing activity  
211 is consistent. Importantly, the bivalent Nb1-Nb2 was effective against Beta (B.1.351)  
212 and Gamma (P.1) viruses, two of the most resistant variants leading almost complete  
213 loss of neutralization activity of the first generation RBM-associated antibodies<sup>32</sup>.

#### 214 **Ultrapotent neutralization activity of the Fc-fused tetravalent biparatopic Nb**

215 Although our bivalent Nb retains broad and relatively strong neutralizing activity, we  
216 hope to optimize its performance through further design. We constructed a human  
217 heavy chain antibody by fusing the human IgG1 Fc region to the C-terminus of bivalent  
218 Nb1-Nb2, making a tetravalent antibody through the disulfide bond formation in Fc



219 hinge area (Fig. 5a). This optimized design can enhance antiviral activity, improve *in*  
220 *vivo* half-life and protein druggability. The tetravalent Nb1-Nb2-Fc was produced in  
221 Expi293F cells with supernatant yield > 20 µg per milliliter in a shaking flask (Fig. 5b).  
222 Most importantly, the tetravalent Nb1-Nb2-Fc exhibited extremely high neutralization  
223 potency against a panel of SARS-CoV-2 GFP/ΔN trVLP variants of concern. The  
224 neutralization IC<sub>50</sub> values of the tetravalent Nb1-Nb2-Fc range from 0.0097 nM (0.0012  
225 µg/mL) to 0.0987 nM (0.0118 µg/mL) depending on different variants, 32-183 folds  
226 increase to the corresponding bivalent Nb1-Nb2 (Fig. 5c-d). VOC and VOI derived  
227 pseudoviruses neutralization assays resulted in a similar activity enhancement (Fig. S2).  
228 In addition, the thermal stability was also satisfied for the Nb1-Nb2-Fc (Fig. S3).

### 229 **Biparatopic Nb1-Nb2-Fc maintains high activity against the Omicron variant**

230 The development of neutralizing antibody drugs for highly variable viruses has always  
231 been a challenge in the academy and industry. On 26 November 2021, WHO designated  
232 the variant B.1.1.529 a variant of concern, named Omicron. The Omicron RBD carries  
233 15 mutations, most of which localize within the RBM region (Fig. 6a), resulting in  
234 reduced vaccine effectiveness and activity loss of many neutralizing antibodies<sup>33,34</sup>. We  
235 first measured the binding kinetic of different Nbs against Omicron RBD by BLI.  
236 Results showed that the tetravalent Nb1-Nb2-Fc demonstrated the strongest affinity  
237 with  $KD < 1.0 \times 10^{-12}$  M, and the monomeric Nb1 and bivalent Nb1-Nb2 still maintained  
238 an ideal binding, though Omicron RBD completely escaped from binding with the  
239 monomeric Nb2 (Fig. 6b & 6d). Furthermore, to evaluate the neutralization potency of  
240 our Nbs against the Omicron variant, we packaged the pseudovirus harboring the  
241 Omicron Spike glycoprotein. It's very encouraging that the tetravalent biparatopic Nb1-  
242 Nb2-Fc maintained potent neutralization activity against Omicron with IC<sub>50</sub> around  
243 0.0017 nM, which is comparable to other VOC and VOI pseudoviruses (Fig. 6d & Fig.  
244 S2). For the Omicron variant, there was no evidence showing the activity reduction for  
245 our biparatopic Nbs, either in terms of affinity or neutralization potency. All these data  
246 suggests that ultrapotent SARS-CoV-2 neutralization antibodies with mutation  
247 resistance can be obtained through optimized screening and reasonable design.

## 248 **Discussion**

249 The COVID-19 vaccination rate has been accelerating globally, but SARS-CoV-2  
250 transmission has no sign of stopping and the virus will continue to evolve. Recently,  
251 the variants Delta and Omicron have become the intensively concerned strains due to  
252 their unparalleled transmissibility. Several therapeutic antibody cocktails have been  
253 approved for postexposure treatment to reduce severe illness<sup>12,13</sup>. However, the potency  
254 of some antibodies is compromised by the emerging SARS-CoV-2 high-frequency  
255 mutation variants<sup>32,35</sup>, highlighting an urgent demand on developing next-generation  
256 antibodies with breadth and potency.

257 In this study, we identified a panel of SARS-CoV-2 neutralizing Nbs and designed a  
258 biparatopic heavy chain antibody Nb1-Nb2-Fc that targets the overlapping but distinct  
259 RBD antigenic regions and keeps cross-affinity with all of the SARS-CoV-2 RBD  
260 variants of concern that we tested. Nb1-Nb2-Fc broadly neutralizes pseudotyped  
261 viruses containing Spikes from the WHO designated variants Alpha, Beta, Gamma,  
262 Delta, Lambda, Kappa, Mu and Omicron, and other more than 60 representative  
263 circulating point mutated SARS-CoV-2 pseudoviruses. Neutralization against live  
264 SARS-CoV-2 variants was also confirmed and consistent with the pseudovirus model.  
265 As the virus is adapting to human and animal hosts and evolving rapidly, the antibody  
266 coverage and unique neutralization mechanism become critical to prevent and treat  
267 infection by emerging variants and to minimize the risk of viral escape. Our results  
268 indicate that the biparatopic heavy chain antibody is a promising one against the broad  
269 spectrum of variants currently being concerned.

270 Although more and more SARS-CoV-2 neutralizing antibody binding sites have been  
271 reported<sup>36,37</sup>, including NTD, the most effective epitopes localize on RBD due to its  
272 natural role to bind human ACE2. SARS-CoV-2 RBD has been structurally defined into  
273 seven “core” antibody-binding communities. Generally, antibodies from communities  
274 RBD-1 through RBD-4 are relatively more potent, but highly susceptible to  
275 neutralization escape by mutations. Whereas RBD-5 through RBD-7 binding antibodies

276 often have lower potency but are more resistant to escape. Although we attempted to  
277 use crystallography and cryo-electron microscopy to elucidate the details of the  
278 interaction between the identified Nbs and RBD, unfortunately, valuable information  
279 was not obtained. Using highly extensive RBD mutagenesis and pseudovirus  
280 techniques, we identified the key amino acids resistant to Nb neutralization. Based on  
281 the mapped epitope sequences, Nb1 and Nb2 demonstrated different binding sites but  
282 overlapped to some extent. Nb1 recognized sites localizes on the outer face of the RBD,  
283 but Nb2 binds mainly to the RBM. Interestingly, Glutamic Acid at position 484 is the  
284 shared landmark amino acid for both Nb1 and Nb2. For the monomeric Nb1 and Nb2,  
285 their neutralization potency was significantly lowered or even lost when several key  
286 amino acids were altered. However, benefiting from the rational design of biparatopic  
287 strategy, our tandem fusion form of Nb1 and Nb2 can efficiently neutralize all mutant  
288 pseudoviruses and variants of concern, some of which are completely resistant to the  
289 monomeric Nbs.

290 In recent years with the SARS-CoV-2 pandemic, many attentions have been turned to  
291 Nbs, also known as single-domain antibody or VHH, which are derived from camelids  
292 and easier to produce. SARS-CoV-2 neutralizing Nbs have been discovered and  
293 reported by several laboratories, including ours<sup>27,38</sup>. Because of their small size and  
294 flexible combination for multimers, Nbs are becoming powerful weapons against  
295 pathogens. Multivalent Nbs have been documented for several viruses with much  
296 stronger neutralization potency than single Nbs<sup>25</sup>, and multivalent antibodies that bind  
297 two epitopes also prevent the emergence of viral escape mutants<sup>39</sup>. It's worth pointing  
298 out that the neutralization activity is increased for tens to 2 log fold in the tetravalent  
299 Nb1-Nb2-Fc context, which functions as a heavy chain antibody with a double punch  
300 against SARS-CoV-2 in each arm through biepitopic binding. The tetravalent Nb1-  
301 Nb2-Fc is evident with high yield in mammalian cells and durable stability at 37°C,  
302 potentiating the application for either an injectable formula or administration by  
303 inhalation.

304 Taken together, the results presented here for Nb-based neutralizing antibody  
305 development, offers a detailed pipeline and strategy to combat with emerging SARS-  
306 CoV-2 variants with super wide neutralization breadth. Moreover, these findings  
307 indicate that Nb1-Nb2-Fc is a promising candidate for clinical development and could  
308 be stockpiled as part of a pandemic readiness toolbox.  
309  
310

## 311 **Materials and Methods**

### 312 **Cells and reagents.**

313 The HEK293T (human kidney epithelial) cells were obtained from China Infrastructure  
314 of Cell Line Resource (Beijing, China). The human hepatoma cell line Huh7 was  
315 obtained from Apath, Inc (Brooklyn, NY, USA) with permission from Dr. Charles Rice  
316 (Rockefeller University). The Expi293F cells were purchased from ThermoFisher  
317 (Waltham, MA, USA). The cells were maintained in Dulbecco's modified Eagle's  
318 medium (ThermoFisher) supplemented with 2-10% fetal bovine serum (FBS,  
319 ThermoFisher), non-essential amino acid, penicillin and streptomycin. Recombinant  
320 RBD and ACE2 proteins were purchased from Sino Biological (Beijing, China).  
321 HRP/anti-CM13 monoclonal conjugate was from GE Healthcare (Boston, MA, USA).

### 322 **Screen of nanobody library**

323 A synthetic nanobody phage display library with high-diversity was prepared as  
324 previously described<sup>27</sup>. Screening for nanobodies was performed by panning in both  
325 immunotubes and with magnetic bead-conjugated antigen, using SARS-CoV-2 variants  
326 P.1 and B.1.617 derived recombinant RBD proteins. Briefly, for the 2nd and 4th  
327 panning rounds, the purified SARS-CoV-2 RBD proteins were coated on Nunc  
328 MaxiSorp immuno tubes (ThermoFisher) at 5µg/mL in PBS overnight. For the 1st and  
329 3rd panning rounds, RBD protein was first biotinylated with EZ-Link™ Sulfo-NHS-  
330 LC-Biotin (ThermoFisher) and then selected with streptavidin-coated magnetic  
331 Dynabeads™ M-280 (ThermoFisher). The panning was performed according to a  
332 standard protocol<sup>27</sup>. After 4 rounds of panning, phage ELISA identification was  
333 performed with 960 individual colonies using Anti-CM13 antibody in the plates coated  
334 with recombinant RBDs. The absorbance was measured using a SpectraMax M5 plate  
335 reader from Molecular Devices (San Jose, CA, USA). The positive clones were sent for  
336 sequencing. After sequence alignments, the distinct sequences were chosen for protein  
337 expression.

### 338 **Expression and purification of nanobodies.**

339 Full-length sequences of selected nanobodies were PCR amplified and cloned into the  
340 NcoI/XhoI sites of the pET28b (Novagen, Sacramento, CA, USA) and transformed into  
341 BL21(DE3) chemically competent *E. coli*. The expression of recombinant nanobodies  
342 was induced by adding IPTG to a final concentration of 0.3 mM after culture had  
343 reached OD<sub>600</sub>=0.5-0.6 and grown over night at 25°C. The nanobodies were fused with  
344 a His-tag at C-terminus and purified over Ni Sepharose 6 Fast Flow (GE Healthcare)  
345 and eluted with 400 mM imidazole. Affinity purified sdAbs were dialyzed against PBS  
346 to eliminate imidazole.

### 347 **Construction of bivalent and Fc-fused nanobodies**

348 To improve the neutralization activity of Nbs, we constructed dimeric nanobodies with  
349 various combinations and a (GGGS)<sub>5</sub> linker was introduced between the two  
350 monomers. The recombinant bivalent nanobodies were produced in *E. coli*. and a His-  
351 tag was designed to facilitate purification. In addition, the sequence of dimeric Nb1-  
352 Nb2 was cloned into a mammalian expression vector under the control of hEF1-HTLV  
353 promotor and fused with N-terminal interleukin-2 signal peptide and C-terminal Fc  
354 region, comprising the CH2 and CH3 domains of human IgG1 heavy chain and the  
355 hinge region. Maxiprepmed plasmids were transiently transfected into Expi293F cells  
356 (ThermoFisher) and the cells were further cultured in suspension for 2-3 days before  
357 harvesting antibody-containing supernatant. Fc-fused nanobody was prepared with  
358 prepacked HiTrap® Protein A HP column (GE Healthcare). The produced Fc-fusion  
359 protein was analyzed by SDS-PAGE using standard protocols for dimerization, yield  
360 and purity measurement.

### 361 **Pseudotyped virus and neutralization assay**

362 To produce SARS-CoV-2 pseudovirus, HEK293T cells were seeded 1 day before  
363 transfection at  $2.5 \times 10^6$  cells in a 10-cm plate. The next day, cells were transfected using  
364 Lipofectamine 2000 (ThermoFisher). The plasmid DNA transfection mixture (1 ml)  
365 was composed of 15 µg of pNL-4.3-Luc-E-R- and 15 µg of pcDNA-SARS-CoV-2-S  
366 that was purchased from Sino Biologicals and reconstructed by deletion of 18 amino

367 acid cytoplasmic tail. A nonenveloped lentivirus particle (Bald virus) was also  
368 generated as negative control. Sixteen hours after transfection, the media was replaced  
369 with fresh media supplemented with 2% FBS. Supernatants containing pseudovirus  
370 were typically harvested at 36–48 h after transfection and then filtered through a syringe  
371 filter (0.22 $\mu$ m) to remove any cell debris. The pseudovirus was freshly used or allocated  
372 and frozen at -80°C. To conduct the virus entry assay,  $1 \times 10^4$  Huh7 cells were seeded in  
373 each well of a 96-well plate at 1 day prior to transduction. The next day, 100  $\mu$ L of  
374 supernatant containing pseudovirus was added into each well in the absence or presence  
375 of serially diluted Nbs or human IgG1 Fc-fused Nb. Forty-eight hours after transduction,  
376 the cells were lysed in 100  $\mu$ L of passive lysis buffer and 50  $\mu$ L lysate was incubated  
377 with 100  $\mu$ L of luciferase assay substrate according to the manufacturer's instructions  
378 (Promega, Madison, WI, USA).

379 Substitutions of the residues at the sites selected for mutagenesis were based on  
380 the pcDNA3.1-SARS-CoV-2-S (GenBank: MN\_908947), which was purchased from  
381 Sino Biologicals and reconstructed by deletion of 18 amino acid cytoplasmic tail.  
382 Following the procedure of circular PCR, 15 to 20 nucleotides before and after the  
383 target mutation site were selected as forward primers, while the reverse complementary  
384 sequences were selected as reverse primers. Site-directed mutagenesis was induced  
385 with a commercialized KOD-Plus mutagenesis kit (TOYOBO, Cat. No.SMK-101). The  
386 mutations were confirmed by DNA sequence analysis (Rui Biotech, Guangzhou, China).  
387 The primers for the specific mutation sites are in Table S2. For the variants derived  
388 pseudovirus, the spike genes were codon optimized, synthesized, and cloned into  
389 pCAGGS vector. The profile of amino acid changes compared to the wild-type virus  
390 (Genbank QHD43416.1) for each variant are listed in Table S3.

### 391 **Production of genetic complementation SARS-CoV-2 (SARS-CoV-2 GFP/ $\Delta$ N** 392 **trVLP)**

393 A nucleocapsid (N)-based genetic complementation system for production of SARS-  
394 CoV-2 at BSL-2 laboratory was described previously<sup>31</sup>. Briefly, cDNAs (for multiple  
395 variants) of SARS-CoV-2 GFP/ $\Delta$ N were synthesized. The N gene is replaced with the

396 gene of green fluorescent protein (GFP). RNA transcripts were *in vitro* transcribed by  
397 the mMESAGE mMACHINE T7 Transcription Kit (ThermoFisher Scientific) and  
398 transfected into Caco-2-N cells by electroporation. The produced SARS-CoV-2 can be  
399 amplified and titrated in Caco-2-N cells. Serially diluted antibodies were mixed with  
400 SARS-CoV-2 and inoculated into Caco-2-N cells. The infection efficiency was  
401 measured by flow cytometry analysis at 48 h post infection.

#### 402 **Biolayer interferometry (BLI) measurement**

403 Antibody affinity analysis was conducted by ForteBio Octet RRD 96 system. The  
404 VOC/VOI derived RBD recombinant proteins (Sino Biological, Cat: 40592-  
405 V08H/V08H82/V08H85/V08H86/V08H88/V08H90) were diluted in 10 mM Acetate  
406 pH 5.5 buffer at a density of 10 $\mu$ g/ml. The Amine Reactive 2<sup>nd</sup> Generation biosensors  
407 surface was activated with EDC and NHS, then immobilized the RBD proteins for 5  
408 min. Following 10 s of baseline in kinetic buffer (KB: 1 $\times$  PBS, 0.01% BSA, and 0.02%  
409 Tween-20), the loaded biosensors were dipped into serially diluted (3.125–50 nM)  
410 nanobodies for 120 s to record association kinetics. The sensors were then dipped into  
411 kinetic buffer for 180 s to record dissociation kinetics. Kinetic buffer without antibody  
412 was set to correct the background. The Octet Data Acquisition 9.0 was used to collect  
413 affinity data. The mean  $K_{on}$ ,  $K_{off}$ , and apparent  $K_D$  values were calculated using an  
414 equation globally fitted to a 1:1 binding kinetic model and using the global fitting  
415 method.

#### 416 **Epitope competition-binding Study.**

417 For the ACE2 competition assay, the RBD-immobilized biosensors were then dipped  
418 into the wells containing 100 nM of ACE2 for a 360-s association period. The sensors  
419 were then transferred to wells containing 100nM ACE2 or 100nM ACE2 +100nM Nb  
420 samples and incubated for 400s. For all BLI assays, data analysis was performed using  
421 Octet data analysis software version 11.0 (Pall FortéBio).

#### 422 **Stability tests**

423 Antibody samples diluted in PBS (1 mg/mL) were filtrated and sealed in a 1.5 mL



424 Eppendorf tube and stored at 37°C for 3 or 6 days. At the end of the storage period,  
425 samples were centrifuged (10,000× g) for 10 min and neutralization activities were  
426 evaluated using pseudovirus.

#### 427 **Circular Dichroism measurements**

428 CD spectral data of the protein solution was obtained using the Spectra Measurement  
429 program on a Jasco J-815 CD spectrometer equipped with a 1.0 mm path length unit.  
430 HBS solution with 20 mmol/L concentration was mixed with Nano antibodies  
431 separately so that the final concentration was 15 μmol/L. The wavelength range from  
432 200 nm to 250 nm was scanned and far-ultraviolet spectrum data was collected.  
433 SpectraManger software was used to process the collected data to obtain the content of  
434 the circular chromatogram of each system. Temperature regulation was carried out  
435 using the Variable Temperature Measurement program. A data pitch of 0.1 nm and  
436 bandwidth of 1 nm was used. Heat-induced unfolding was recorded at 208 or 218 nm,  
437 and a heating rate of 0.5°C/min was used.

#### 438 **Antibody-escape sites visualization**

439 The RBD and ACE2 binding crystal structure (PDB: 6M0J) is represented by a surface  
440 pattern. The antibody-escape amino acids on RBD are colored at each site. Different  
441 degrees of escape are indicated in different colors. Red represents complete escape,  
442 pink represents moderate escape, and light pink represents weak escape. Interactive  
443 visualizations of the escape maps and their projection onto the ACE2-bound were  
444 created using dms-view (<https://dms-view.github.io/docs/>).

#### 445 **Statistics and reproducibility.**

446 Data were analyzed using GraphPad Prism 6.01 (GraphPad Software, San Diego, CA,  
447 USA). The values shown in the graphs are presented as means ± SD. One representative  
448 result from at least two independent experiments was shown. Antibody neutralization  
449 experiments usually use three to four duplicated wells for each treatment. The  
450 infectivity data were first inversed to neutralization activity. Each neutralization data  
451 set was normalized by the background control (no virus) to define the real value for

452 100% neutralization. After transformation to neutralization, the lowest concentration  
453 point of antibody treatment was set to 0% neutralization. Then, a 4-parameters  
454 neutralization nonlinear regression model was fitted to report IC<sub>50</sub> values. All  
455 experiments were performed independently at least twice and similar results were  
456 obtained. One representative data of one experiment were shown.

457

#### 458 **Data Availability**

459 The source data underlying Figs. 1a, 1d, 1f, 4a, 4b, 5c, 6c are provided as a Source Data  
460 file. The sequences of Nb CDRs are listed in Table S1. All other data are available from  
461 the corresponding author upon reasonable requests.

462

#### 463 **Competing interests**

464 A patent application has been filed on the nanobodies reported in this study.

465

#### 466 **ACKNOWLEDGEMENTS**

467 This work was supported by CAMS Innovation Fund for Medical Sciences (2021-I2M-  
468 1-038) and National Natural Science Foundation of China (81871667 and 82002153).  
469 Drs Xiangxi Wang, Sheng Cui, Zhijian Li, Lei Wang and Han Wen provided help and  
470 advice on structural biology analysis.

471

472

473

474 **REFERENCES**

- 475 1 Huang, C. *et al.* Clinical features of patients infected with 2019 novel coronavirus in Wuhan,  
476 China. *Lancet* **395**, 497-506, doi:10.1016/S0140-6736(20)30183-5 (2020).
- 477 2 Wu, F. *et al.* A new coronavirus associated with human respiratory disease in China. *Nature*  
478 **579**, 265-269, doi:10.1038/s41586-020-2008-3 (2020).
- 479 3 Bosco-Lauth, A. M. *et al.* Experimental infection of domestic dogs and cats with SARS-  
480 CoV-2: Pathogenesis, transmission, and response to reexposure in cats. *Proc Natl Acad*  
481 *Sci U S A* **117**, 26382-26388, doi:10.1073/pnas.2013102117 (2020).
- 482 4 Chandler, J. C. *et al.* SARS-CoV-2 exposure in wild white-tailed deer (*Odocoileus*  
483 *virginianus*). *Proc Natl Acad Sci U S A* **118**, doi:10.1073/pnas.2114828118 (2021).
- 484 5 Wiersinga, W. J., Rhodes, A., Cheng, A. C., Peacock, S. J. & Prescott, H. C. Pathophysiology,  
485 Transmission, Diagnosis, and Treatment of Coronavirus Disease 2019 (COVID-19): A  
486 Review. *JAMA* **324**, 782-793, doi:10.1001/jama.2020.12839 (2020).
- 487 6 Cave, J. A. & Phizackerley, D. Molnupiravir: evidence by press release. *Drug Ther Bull*,  
488 doi:10.1136/dtb.2021.000064 (2021).
- 489 7 Sheahan, T. P. *et al.* An orally bioavailable broad-spectrum antiviral inhibits SARS-CoV-2  
490 in human airway epithelial cell cultures and multiple coronaviruses in mice. *Sci Transl Med*  
491 **12**, doi:10.1126/scitranslmed.abb5883 (2020).
- 492 8 Simsek-Yavuz, S. & Komsuoglu Celikyurt, F. I. An update of anti-viral treatment of COVID-  
493 19. *Turk J Med Sci* **51**, 3372-3390, doi:10.3906/sag-2106-250 (2021).
- 494 9 Logunov, D. Y. *et al.* Safety and immunogenicity of an rAd26 and rAd5 vector-based  
495 heterologous prime-boost COVID-19 vaccine in two formulations: two open, non-  
496 randomised phase 1/2 studies from Russia. *Lancet* **396**, 887-897, doi:10.1016/S0140-  
497 6736(20)31866-3 (2020).
- 498 10 Polack, F. P. *et al.* Safety and Efficacy of the BNT162b2 mRNA Covid-19 Vaccine. *N Engl J*  
499 *Med* **383**, 2603-2615, doi:10.1056/NEJMoa2034577 (2020).
- 500 11 Xia, S. *et al.* Effect of an Inactivated Vaccine Against SARS-CoV-2 on Safety and  
501 Immunogenicity Outcomes: Interim Analysis of 2 Randomized Clinical Trials. *JAMA* **324**,  
502 951-960, doi:10.1001/jama.2020.15543 (2020).
- 503 12 Walls, A. C. *et al.* Elicitation of broadly protective sarbecovirus immunity by receptor-  
504 binding domain nanoparticle vaccines. *Cell* **184**, 5432-5447 e5416,  
505 doi:10.1016/j.cell.2021.09.015 (2021).
- 506 13 Weinreich, D. M. *et al.* REGN-COV2, a Neutralizing Antibody Cocktail, in Outpatients with  
507 Covid-19. *N Engl J Med* **384**, 238-251, doi:10.1056/NEJMoa2035002 (2021).
- 508 14 Zhou, P. *et al.* A pneumonia outbreak associated with a new coronavirus of probable bat  
509 origin. *Nature* **579**, 270-273, doi:10.1038/s41586-020-2012-7 (2020).
- 510 15 Jeyanathan, M. *et al.* Immunological considerations for COVID-19 vaccine strategies. *Nat*  
511 *Rev Immunol* **20**, 615-632, doi:10.1038/s41577-020-00434-6 (2020).
- 512 16 Krammer, F. SARS-CoV-2 vaccines in development. *Nature* **586**, 516-527,  
513 doi:10.1038/s41586-020-2798-3 (2020).
- 514 17 Ju, B. *et al.* Human neutralizing antibodies elicited by SARS-CoV-2 infection. *Nature* **584**,  
515 115-119, doi:10.1038/s41586-020-2380-z (2020).
- 516 18 Hastie, K. M. *et al.* Defining variant-resistant epitopes targeted by SARS-CoV-2 antibodies:  
517 A global consortium study. *Science* **374**, 472-478, doi:10.1126/science.abh2315 (2021).

- 518 19 Li, Q. *et al.* The Impact of Mutations in SARS-CoV-2 Spike on Viral Infectivity and  
519 Antigenicity. *Cell* **182**, 1284-1294 e1289, doi:10.1016/j.cell.2020.07.012 (2020).
- 520 20 Chen, R. E. *et al.* In vivo monoclonal antibody efficacy against SARS-CoV-2 variant strains.  
521 *Nature* **596**, 103-108, doi:10.1038/s41586-021-03720-y (2021).
- 522 21 Chen, R. E. *et al.* Resistance of SARS-CoV-2 variants to neutralization by monoclonal and  
523 serum-derived polyclonal antibodies. *Nat Med* **27**, 717-726, doi:10.1038/s41591-021-  
524 01294-w (2021).
- 525 22 Hamers-Casterman, C. *et al.* Naturally occurring antibodies devoid of light chains. *Nature*  
526 **363**, 446-448, doi:10.1038/363446a0 (1993).
- 527 23 Nuttall, S. D. *et al.* Isolation of the new antigen receptor from wobbegong sharks, and use  
528 as a scaffold for the display of protein loop libraries. *Mol Immunol* **38**, 313-326,  
529 doi:10.1016/s0161-5890(01)00057-8 (2001).
- 530 24 Saerens, D., Ghassabeh, G. H. & Muyldermans, S. Single-domain antibodies as building  
531 blocks for novel therapeutics. *Curr Opin Pharmacol* **8**, 600-608,  
532 doi:10.1016/j.coph.2008.07.006 (2008).
- 533 25 Cunningham, S. *et al.* Nebulised ALX-0171 for respiratory syncytial virus lower respiratory  
534 tract infection in hospitalised children: a double-blind, randomised, placebo-controlled,  
535 phase 2b trial. *Lancet Respir Med* **9**, 21-32, doi:10.1016/S2213-2600(20)30320-9 (2021).
- 536 26 Cameroni, E. *et al.* Broadly neutralizing antibodies overcome SARS-CoV-2 Omicron  
537 antigenic shift. *bioRxiv*, doi:10.1101/2021.12.12.472269 (2021).
- 538 27 Chi, X. *et al.* Humanized single domain antibodies neutralize SARS-CoV-2 by targeting  
539 the spike receptor binding domain. *Nat Commun* **11**, 4528, doi:10.1038/s41467-020-  
540 18387-8 (2020).
- 541 28 Detalle, L. *et al.* Generation and Characterization of ALX-0171, a Potent Novel Therapeutic  
542 Nanobody for the Treatment of Respiratory Syncytial Virus Infection. *Antimicrob Agents*  
543 *Chemother* **60**, 6-13, doi:10.1128/AAC.01802-15 (2016).
- 544 29 Greaney, A. J. *et al.* Complete Mapping of Mutations to the SARS-CoV-2 Spike Receptor-  
545 Binding Domain that Escape Antibody Recognition. *Cell Host Microbe* **29**, 44-57 e49,  
546 doi:10.1016/j.chom.2020.11.007 (2021).
- 547 30 Mercatelli, D. & Giorgi, F. M. Geographic and Genomic Distribution of SARS-CoV-2  
548 Mutations. *Front Microbiol* **11**, 1800, doi:10.3389/fmicb.2020.01800 (2020).
- 549 31 Ju, X. *et al.* A novel cell culture system modeling the SARS-CoV-2 life cycle. *PLoS Pathog*  
550 **17**, e1009439, doi:10.1371/journal.ppat.1009439 (2021).
- 551 32 Hoffmann, M. *et al.* SARS-CoV-2 variants B.1.351 and P.1 escape from neutralizing  
552 antibodies. *Cell* **184**, 2384-2393 e2312, doi:10.1016/j.cell.2021.03.036 (2021).
- 553 33 Lu, L. *et al.* Neutralization of SARS-CoV-2 Omicron variant by sera from BNT162b2 or  
554 Coronavac vaccine recipients. *Clin Infect Dis*, doi:10.1093/cid/ciab1041 (2021).
- 555 34 He, X., Hong, W., Pan, X., Lu, G. & Wei, X. SARS-CoV-2 Omicron variant: Characteristics  
556 and prevention. *MedComm* **2**, 838-845, doi:<https://doi.org/10.1002/mco2.110> (2021).
- 557 35 Wang, Y. *et al.* The significant immune escape of pseudotyped SARS-CoV-2 variant  
558 Omicron. *Emerg Microbes Infect* **11**, 1-5, doi:10.1080/22221751.2021.2017757 (2022).
- 559 36 Cao, Y. *et al.* Potent Neutralizing Antibodies against SARS-CoV-2 Identified by High-  
560 Throughput Single-Cell Sequencing of Convalescent Patients' B Cells. *Cell* **182**, 73-84 e16,  
561 doi:10.1016/j.cell.2020.05.025 (2020).

- 562 37 Chi, X. *et al.* A neutralizing human antibody binds to the N-terminal domain of the Spike  
563 protein of SARS-CoV-2. *Science* **369**, 650-655, doi:10.1126/science.abc6952 (2020).
- 564 38 Xiang, Y. *et al.* Versatile and multivalent nanobodies efficiently neutralize SARS-CoV-2.  
565 *Science* **370**, 1479-1484, doi:10.1126/science.abe4747 (2020).
- 566 39 Miersch, S. *et al.* Tetraivalent SARS-CoV-2 Neutralizing Antibodies Show Enhanced  
567 Potency and Resistance to Escape Mutations. *J Mol Biol* **433**, 167177,  
568 doi:10.1016/j.jmb.2021.167177 (2021).
- 569
- 570
- 571

572 **Figure legends**

573 **Fig. 1 Screen and design of broad-spectrum neutralizing Nbs against SARS-CoV-**  
574 **2.**

575 **a** The purified recombinant proteins of SARS-CoV-2 RBD binding Nbs were separated  
576 by SDS-PAGE and stained with Coomassie Blue. **b** Nbs were incubated with the  
577 indicated SARS-CoV-2 variant pseudoviruses at a final concentration of 5  $\mu\text{g}/\text{mL}$   
578 (0.33 $\mu\text{M}$ ) and inoculated into Huh7 cells. At 48 h post infection, luciferase activities  
579 were measured, and percent neutralization was calculated. Neutralization efficiency  
580 more than 90% was specified as Yes, 50%-90% as Yes/No, and less than 50% as No.  
581 Thermal stability of the purified Nbs were measured using circular dichroism spectra.  
582 **c** Schematic diagram for construction of homo- or heterodimeric Nbs. **d** Neutralization  
583 of SARS-CoV-2 Delta variant Spike-derived pseudovirus by various bivalent Nbs. The  
584 experiments were performed independently at least twice and similar results were  
585 obtained. One representative experiment was shown, and data were average values of  
586 three replicates ( $n = 3$ ). **e** Summary of the half-maximal inhibitory concentration ( $\text{IC}_{50}$ )  
587 values of Fig. 1D. **f** Pseudovirus neutralization activity of different Nb formulation.

588

589 **Fig. 2 Binding affinity of Nbs against the RBDs from multiple circulating SARS-**  
590 **CoV-2 variants.**

591 **a** Fitted line plot showing the binding kinetic of Nbs with the immobilized receptor  
592 binding domain (RBD) proteins, measured using bio-layer interferometry (BLI).  
593 Recombinant RBD proteins were derived from SARS-CoV-2 WT, Alpha, Beta, Gamma,  
594 Delta or Kappa strain. The concentrations of Nb are shown in different colors. **b**  
595 Summary of BLI kinetic and affinity measurements. The equilibrium dissociation  
596 constant ( $K_D$ ), the association constant ( $K_{\text{on}}$ ) and the dissociation constant ( $K_{\text{off}}$ ) are  
597 presented. The assays without binding are marked as “N”.

598

599 **Fig. 3 Epitope mapping using naturally occurring Spike mutants.**

600 **a** The SARS-CoV-2 pseudoviruses were packaged using more than 60 Spike variants

601 identified from circulating viral sequences. The majority of mutations occur on RBD,  
602 including single amino acid substitution, combinational mutation and deletion.  
603 Neutralization activity conferred by Nb1, Nb2, and bivalent Nb1-Nb2 was evaluated.  
604 The x axis shows the ratio of IC<sub>50</sub> of D614G pseudovirus/IC<sub>50</sub> of indicated pseudovirus  
605 variant. When the ratio is greater than 1, the neutralization activity is increased,  
606 otherwise, the activity is decreased. The y axis shows the names of mutations. Data are  
607 represented as mean. All experiments were repeated at least twice. **b** IC<sub>50</sub> values of  
608 indicated Nbs against SARS-CoV-2 mutation pseudovirus were calculated from data in  
609 Fig. 3a. **c** Location of critical amino acids on the RBD (PDB ID: 6M0J) region for Nb1  
610 and Nb2. The key hot spots targeted by Nbs are shown in a color-coding pattern with  
611 resistant strength decending from red to pink. Both sides of RBD are shown from  
612 different angles. **d** Competition between Nbs and ACE2 for binding to the SARS-CoV-  
613 2 RBD. Octet sensors immobilized with the SARS-CoV-2 RBD were first saturated  
614 with ACE2 protein, and then exposed to the Nb1, Nb2 or Nb1-Nb2. The experiments  
615 were independently performed twice, and similar results were obtained.

616

617 **Fig. 4 Neutralization of SARS-CoV-2 VOC and VOI by monomeric and bivalent**  
618 **Nbs.**

619 **a** Neutralization of pseudotyped SARS-CoV-2 variants by Nb1, Nb2 or Nb1-Nb2,  
620 respectively. Pseudovirus was pre-incubated with 10-fold serially diluted Nbs before  
621 inoculation of Huh7 cells. At 48 h post infection, luciferase activities were measured,  
622 and percent neutralization was calculated. The experiments were performed  
623 independently at least twice, and similar results were obtained. One representative data  
624 of one experiment were shown and data were average values of three replicates (n = 3).

625 **b** Determination of neutralization efficacy of bivalent Nb1-Nb2 against recombinant  
626 SARS-CoV-2 GFP/ $\Delta$ N trVLP. The infected cells were subjected to flow cytometry  
627 analysis for quantify the GFP fluorescence at 2 days post-infection. Error bars represent  
628 the standard deviations from three independent experiments (n = 3).

629

630 **Fig. 5 Enhanced neutralization potency by Fc-fused biparatopic Nb.**

631 **a** Schematic representation of the construction of Nb1-Nb2-Fc. Homology modeling of  
632 Nb1-Nb2-Fc was performed with SWISS-MODEL server. The structure is depicted as  
633 surface mode. The CDR regions were colored as pink for Nb1 and blue for Nb2. **b**  
634 Coomassie Blue staining of the Fc vector (lane 1) and Nb1-Nb2-Fc plasmid transfected  
635 Expi293F supernatants. Lane 3 shows the affinity purified Nb1-Nb2-Fc. Fc fusion to  
636 Nb1-Nb2 generates a heavy chain antibody with an approximate molecular weight of  
637 60 kDa in reduced condition. **c** Neutralization of multiple SARS-CoV-2 GFP/ $\Delta$ N trVLP  
638 variants with Nb1-Nb2-Fc. **d** Summary of neutralization IC<sub>50</sub> value of Fc-fused Nb that  
639 was obtained in Fig. 5c. IC<sub>50</sub> fold increases versus the corresponding non-Fc-fused  
640 bivalent Nb were calculated.

641

642 **Fig. 6 Neutralization of Omicron variant (B.1.1.529).**

643 **a** RBD amino acid sequence alignment from multiple VOC and VOI. Mutated points  
644 were colored. Consensus sequence was derived from the Wuhan isolate (wt). **b** Affinity  
645 analysis of four different Nbs against Omicron RBD with BLI. Fitted line plot showing  
646 the binding kinetic of four Nbs with the immobilized Omicron RBD. **c** Neutralization  
647 curve of Omicron pseudovirus by four Nbs. **d** Summary of binding kinetic and  
648 neutralization activity of four Nbs against Omicron variant. The K<sub>on</sub>, K<sub>off</sub>, KD and  
649 neutralization IC<sub>50</sub> value are listed.

650

651

652

653

654

655

656

657

658



659 **Figures**

660

661

662

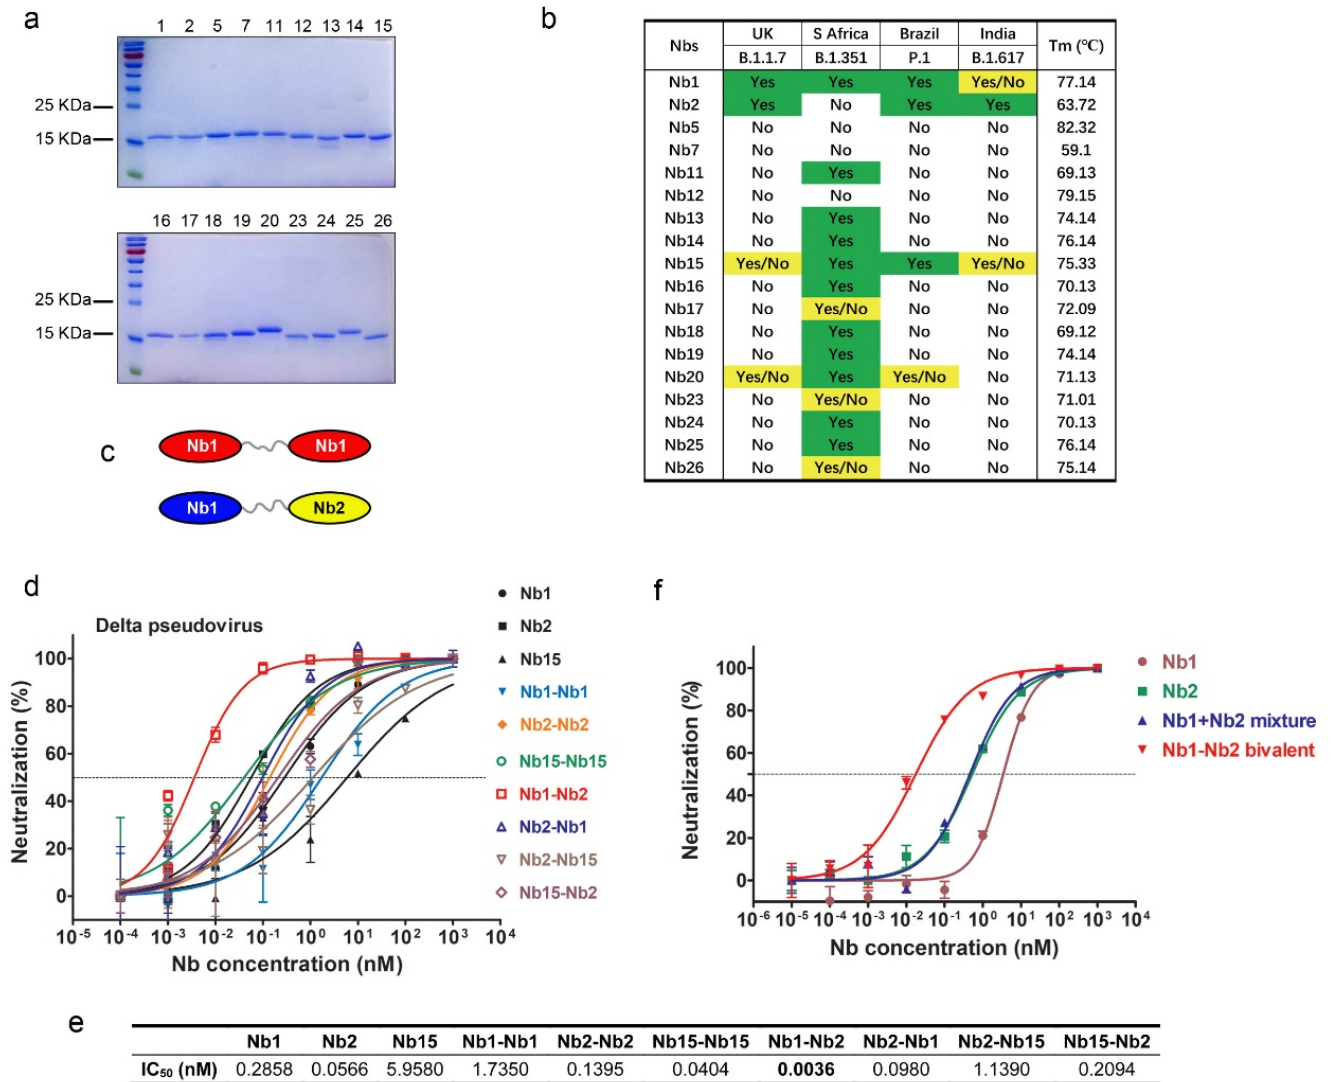

680

681 **Fig. 1 Screen and design of broad-spectrum neutralizing Nbs against SARS-CoV-**

682 **2.**

683

684

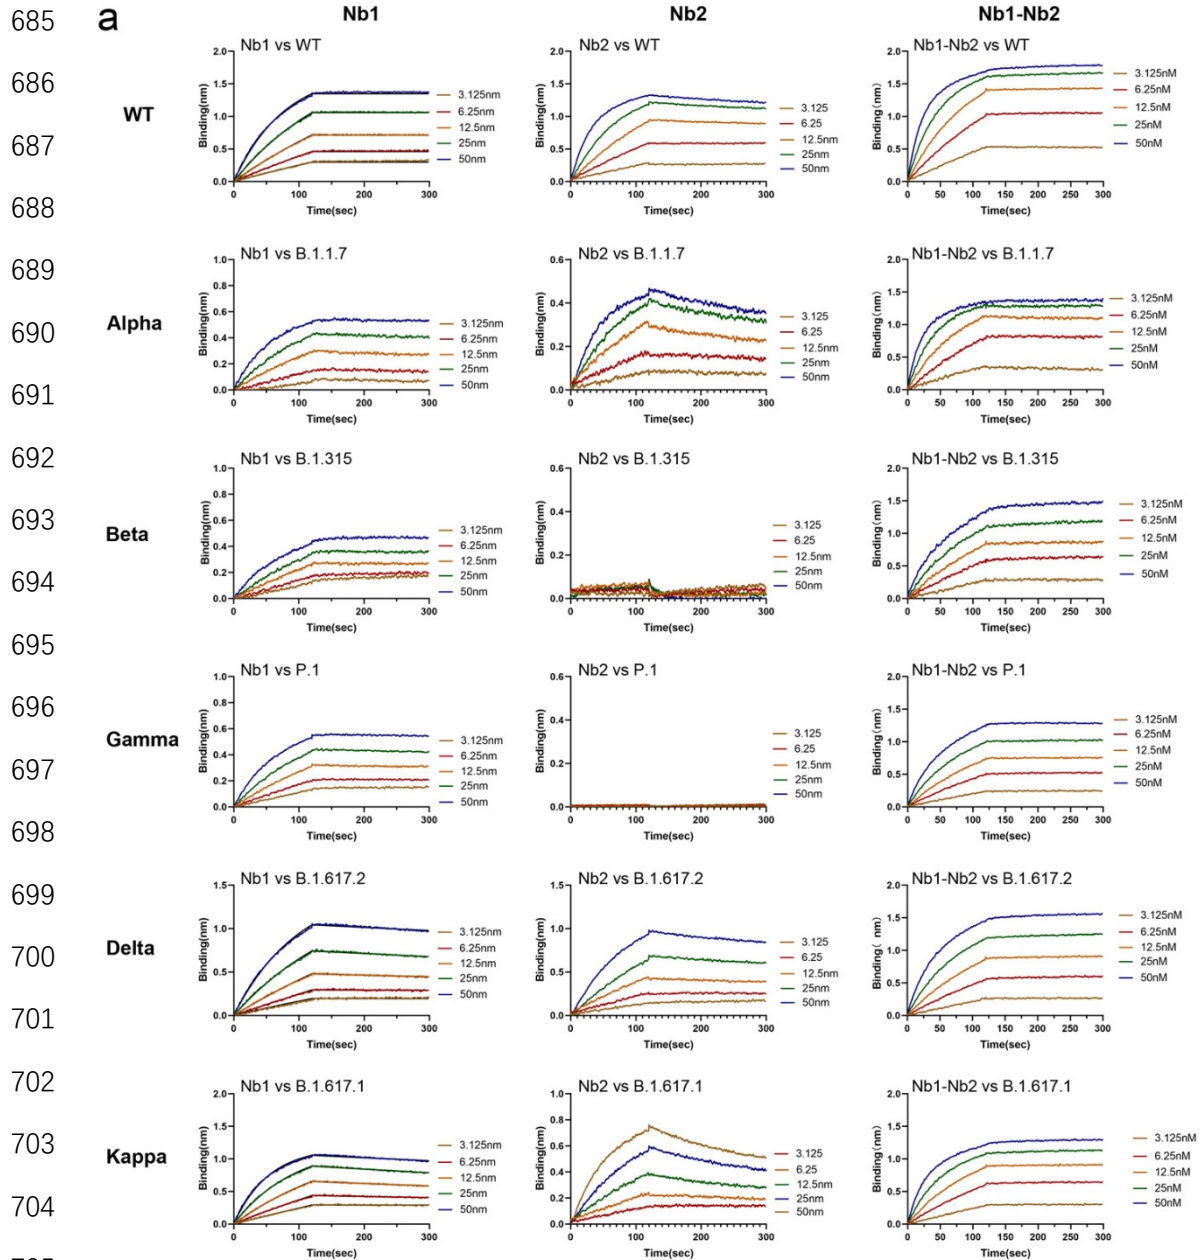

710 **b**

|              | Nb1                         |                        |                         | Nb2                         |                        |                         | Nb1-Nb2                     |                        |                         |
|--------------|-----------------------------|------------------------|-------------------------|-----------------------------|------------------------|-------------------------|-----------------------------|------------------------|-------------------------|
|              | $K_{on}$ ( $M^{-1}s^{-1}$ ) | $K_{off}$ ( $s^{-1}$ ) | $KD$ (M)                | $K_{on}$ ( $M^{-1}s^{-1}$ ) | $K_{off}$ ( $s^{-1}$ ) | $KD$ (M)                | $K_{on}$ ( $M^{-1}s^{-1}$ ) | $K_{off}$ ( $s^{-1}$ ) | $KD$ (M)                |
| <b>WT</b>    | $1.04 \times 10^5$          | $< 1.0 \times 10^{-7}$ | $< 1.0 \times 10^{-12}$ | $1.815 \times 10^5$         | $6.694 \times 10^{-5}$ | $3.689 \times 10^{-10}$ | $3.061 \times 10^5$         | $< 1.0 \times 10^{-7}$ | $< 1.0 \times 10^{-12}$ |
| <b>Alpha</b> | $1.11 \times 10^5$          | $3 \times 10^{-6}$     | $2.7 \times 10^{-11}$   | $2.67 \times 10^5$          | $7.84 \times 10^{-4}$  | $2.94 \times 10^{-9}$   | $2.90 \times 10^5$          | $1.294 \times 10^{-5}$ | $4.461 \times 10^{-11}$ |
| <b>Beta</b>  | $1.19 \times 10^5$          | $< 1.0 \times 10^{-7}$ | $< 1.0 \times 10^{-12}$ | N                           | N                      | N                       | $1.599 \times 10^5$         | $< 1.0 \times 10^{-7}$ | $< 1.0 \times 10^{-12}$ |
| <b>Gamma</b> | $1.10 \times 10^5$          | $1.51 \times 10^{-5}$  | $1.37 \times 10^{-10}$  | N                           | N                      | N                       | $3.242 \times 10^5$         | $< 1.0 \times 10^{-7}$ | $< 1.0 \times 10^{-12}$ |
| <b>Delta</b> | $2.87 \times 10^5$          | $7.61 \times 10^{-5}$  | $2.65 \times 10^{-9}$   | $1.22 \times 10^5$          | $2.49 \times 10^{-4}$  | $2.04 \times 10^{-9}$   | $1.837 \times 10^5$         | $< 1.0 \times 10^{-7}$ | $< 1.0 \times 10^{-12}$ |
| <b>Kappa</b> | $1.46 \times 10^5$          | $6.43 \times 10^{-4}$  | $4.4 \times 10^{-9}$    | $1.90 \times 10^5$          | $1.48 \times 10^{-3}$  | $7.81 \times 10^{-9}$   | $2.762 \times 10^5$         | $< 1.0 \times 10^{-7}$ | $< 1.0 \times 10^{-12}$ |

711 **Fig. 2 Binding affinity of Nbs against the RBDs from multiple circulating SARS-**  
 712 **CoV-2 variants.**

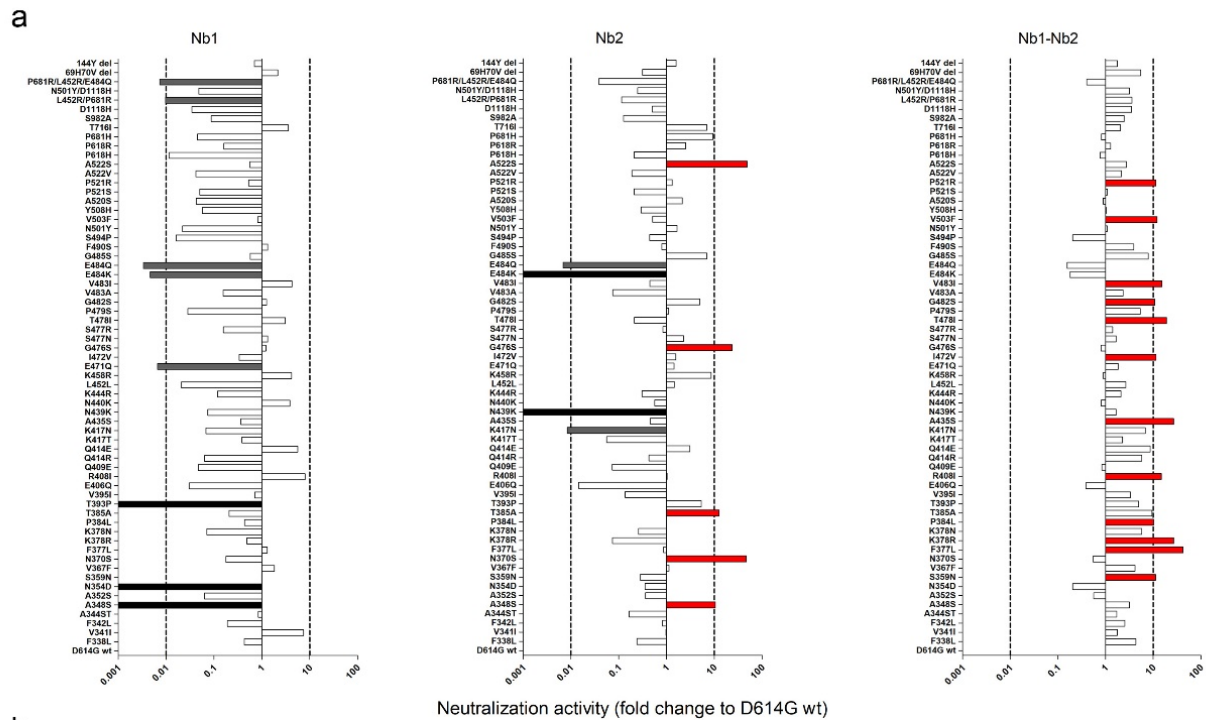

**b**

| RBD mutations IC <sub>50</sub> (nM) |         |        |        |       |         |         |        |                   |        |        |        |                   |        |        |         |  |  |
|-------------------------------------|---------|--------|--------|-------|---------|---------|--------|-------------------|--------|--------|--------|-------------------|--------|--------|---------|--|--|
| Nb1                                 |         |        | Nb2    |       |         | Nb1-Nb2 |        |                   | Nb1    |        |        | Nb2               |        |        | Nb1-Nb2 |  |  |
| D614G wt                            | 0.0666  | 0.1323 | 0.0094 | Q414E | 0.0118  | 0.0426  | 0.0007 | F490S             | 0.0502 | 0.1607 | 0.0016 | F490S             | 0.0502 | 0.1607 | 0.0016  |  |  |
| F338L                               | 0.1554  | 0.5516 | 0.0015 | K417T | 0.1724  | 2.3470  | 0.0028 | S494P             | 4.1460 | 0.3003 | 0.0309 | S494P             | 4.1460 | 0.3003 | 0.0309  |  |  |
| V341I                               | 0.0090  | 0.1366 | 0.0036 | K417N | 0.9749  | 15.7800 | 0.0009 | N501Y             | 3.0160 | 0.0796 | 0.0059 | N501Y             | 3.0160 | 0.0796 | 0.0059  |  |  |
| F342L                               | 0.3500  | 0.1608 | 0.0025 | A435S | 0.1825  | 0.2890  | 0.0002 | V503F             | 0.0809 | 0.2602 | 0.0005 | V503F             | 0.0809 | 0.2602 | 0.0005  |  |  |
| A344ST                              | 0.0789  | 0.8067 | 0.0037 | N439K | 0.8843  | N.R.    | 0.0038 | Y508H             | 1.1660 | 0.4534 | 0.0062 | Y508H             | 1.1660 | 0.4534 | 0.0062  |  |  |
| A348S                               | 67.7200 | 0.0126 | 0.0020 | N440K | 0.0173  | 0.2337  | 0.0078 | A520S             | 1.5660 | 0.0620 | 0.0071 | A520S             | 1.5660 | 0.0620 | 0.0071  |  |  |
| A352S                               | 1.0510  | 0.3646 | 0.0112 | K444R | 0.5603  | 0.4327  | 0.0030 | P521R             | 1.3200 | 0.6323 | 0.0056 | P521R             | 1.3200 | 0.6323 | 0.0056  |  |  |
| N354D                               | N.R.    | 0.3744 | 0.0312 | L452L | 3.1690  | 0.0907  | 0.0024 | P521R             | 0.1263 | 0.1010 | 0.0006 | P521R             | 0.1263 | 0.1010 | 0.0006  |  |  |
| S359N                               | 0.0672  | 0.4674 | 0.0006 | K458R | 0.0160  | 0.0154  | 0.0072 | A522V             | 6.0010 | 0.7029 | 0.0029 | A522V             | 6.0010 | 0.7029 | 0.0029  |  |  |
| V367F                               | 0.0384  | 0.1177 | 0.0015 | E471Q | 10.0500 | 0.0923  | 0.0035 | A522S             | 0.1196 | 0.0027 | 0.0023 | A522S             | 0.1196 | 0.0027 | 0.0023  |  |  |
| N370S                               | 0.3745  | 0.0028 | 0.0115 | I472V | 0.1980  | 0.0841  | 0.0006 | P618H             | 5.7980 | 0.6318 | 0.0063 | P618H             | 5.7980 | 0.6318 | 0.0063  |  |  |
| F377L                               | 0.0512  | 0.1511 | 0.0002 | G476S | 0.0551  | 0.0057  | 0.0079 | P618R             | 0.4140 | 0.0521 | 0.0040 | P618R             | 0.4140 | 0.0521 | 0.0040  |  |  |
| K378R                               | 0.1371  | 1.7950 | 0.0002 | S477N | 0.0603  | 0.0503  | 0.0038 | P681H             | 1.4740 | 0.0141 | 0.0077 | P681H             | 1.4740 | 0.0141 | 0.0077  |  |  |
| K378N                               | 0.0390  | 0.0304 | 0.0011 | S477R | 0.4218  | 0.1569  | 0.0043 | T716I             | 0.0185 | 0.0190 | 0.0031 | T716I             | 0.0185 | 0.0190 | 0.0031  |  |  |
| P384L                               | 0.1534  | 0.1328 | 0.0006 | T478I | 0.0215  | 0.6199  | 0.0003 | S882A             | 0.7595 | 1.0500 | 0.0026 | S882A             | 0.7595 | 1.0500 | 0.0026  |  |  |
| T385A                               | 0.3215  | 0.0105 | 0.0007 | P479S | 2.3450  | 0.1186  | 0.0012 | D1118H            | 1.9100 | 0.2633 | 0.0018 | D1118H            | 1.9100 | 0.2633 | 0.0018  |  |  |
| T393P                               | N.R.    | 0.0248 | 0.0013 | G482S | 0.6534  | 0.0267  | 0.0006 | L452R/P681R       | 6.8270 | 1.1500 | 0.0018 | L452R/P681R       | 6.8270 | 1.1500 | 0.0018  |  |  |
| V395I                               | 0.0937  | 0.9681 | 0.0019 | V483A | 0.4239  | 1.7670  | 0.0027 | N501Y/D1118H      | 1.3840 | 0.5301 | 0.0020 | N501Y/D1118H      | 1.3840 | 0.5301 | 0.0020  |  |  |
| E406Q                               | 2.1910  | 0.1640 | 0.0166 | V483I | 0.0156  | 0.2966  | 0.0004 | P681R/L452R/E484Q | 9.0620 | 3.3480 | 0.0158 | P681R/L452R/E484Q | 9.0620 | 3.3480 | 0.0158  |  |  |
| R408I                               | 0.0083  | 0.1279 | 0.0004 | E484K | 14.3000 | N.R.    | 0.0351 | 144Y del          | 0.0956 | 0.0833 | 0.0036 | 144Y del          | 0.0956 | 0.0833 | 0.0036  |  |  |
| Q409E                               | 1.4170  | 1.7880 | 0.0075 | E484Q | 19.8200 | 19.3200 | 0.0404 |                   |        |        |        |                   |        |        |         |  |  |
| Q414R                               | 1.0520  | 0.3085 | 0.0011 | G485S | 0.1167  | 0.0190  | 0.0008 |                   |        |        |        |                   |        |        |         |  |  |

<0.01   0.01-1   1-10   10-100   >100

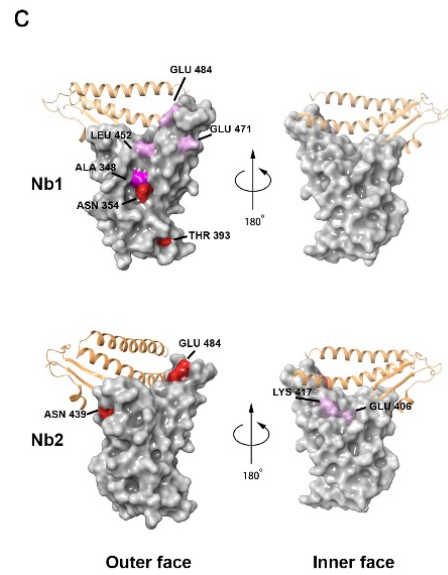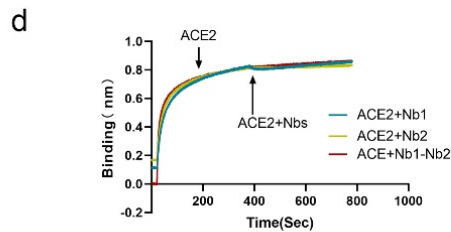

739

740 **Fig. 3 Epitope mapping using naturally occurring Spike mutants.**

741

742

743

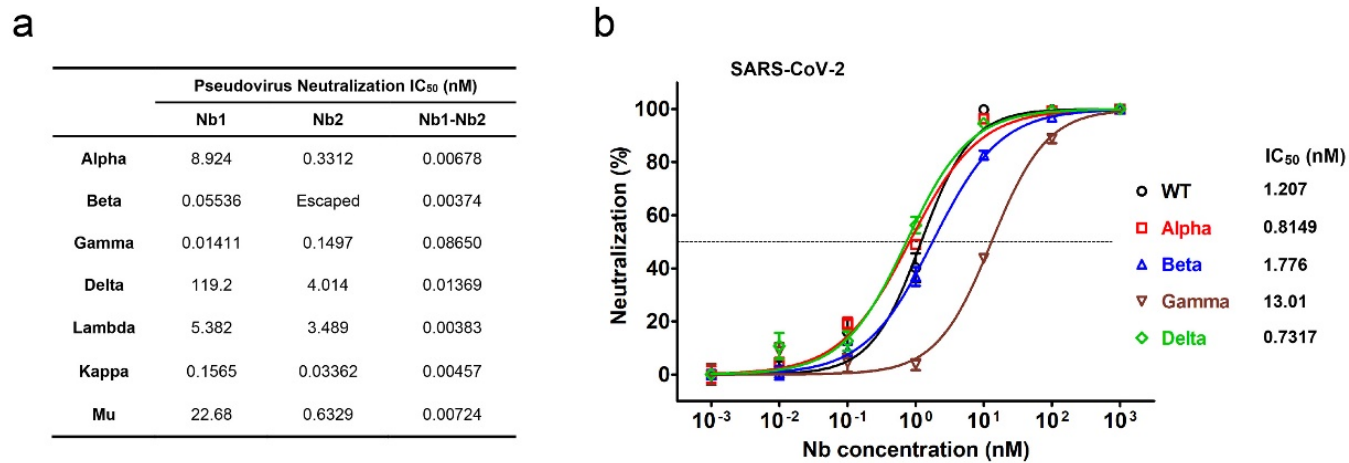

752

753 **Fig. 4 Neutralization of SARS-CoV-2 VOC and VOI by monomeric and bivalent**

754 **Nbs.**

755

756

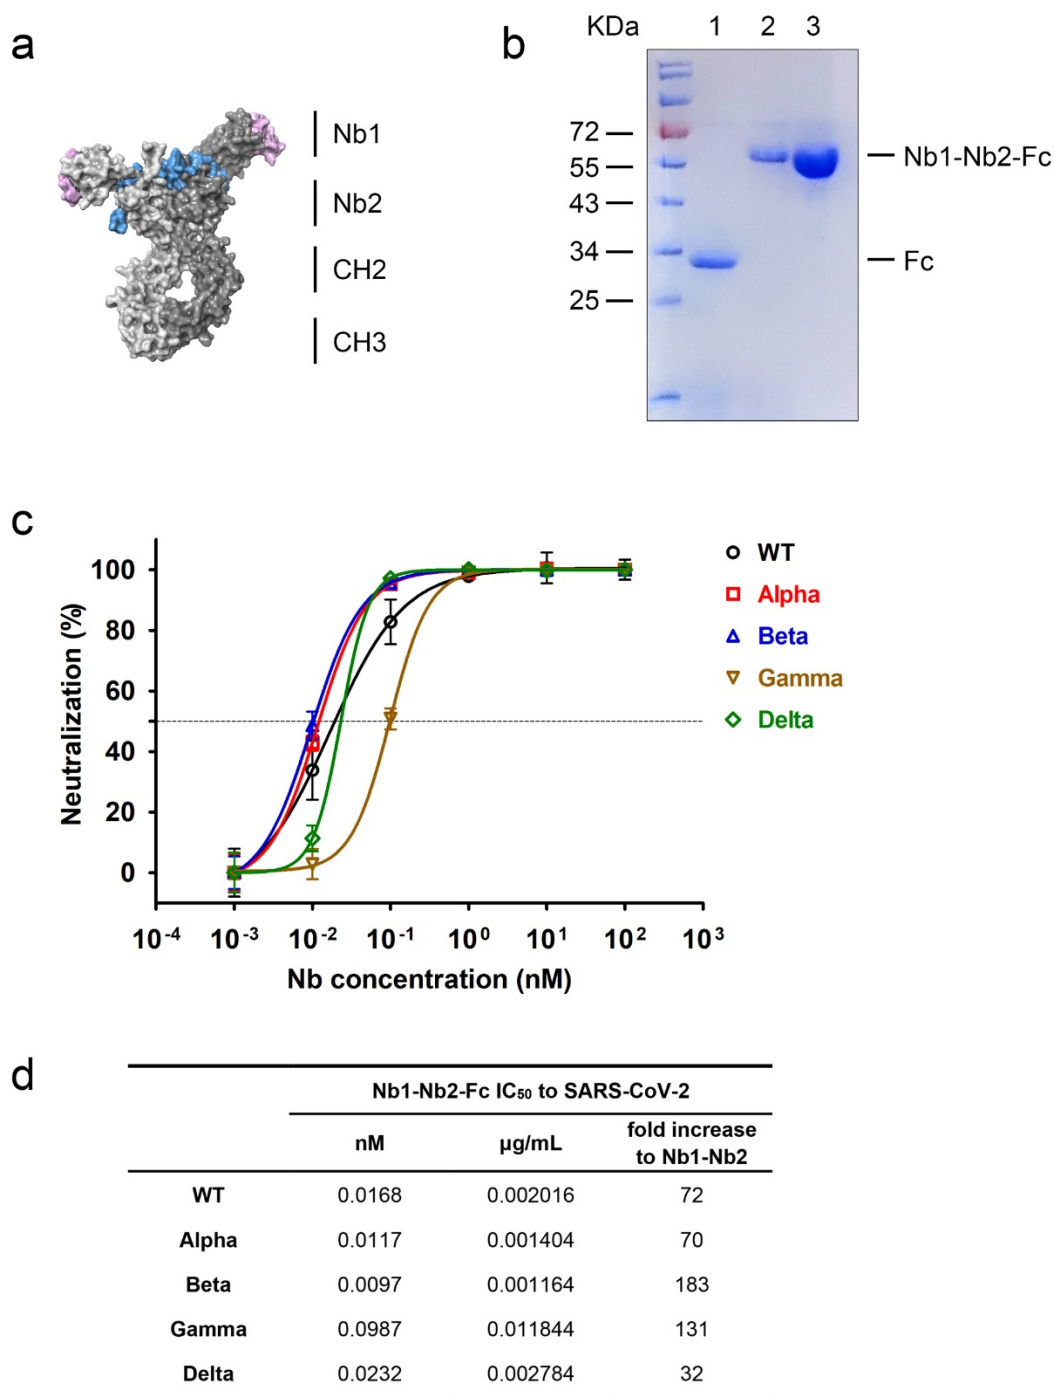

757

758

759 **Fig. 5 Enhanced neutralization potency by Fc-fused biparatopic Nb.**

760

761

a

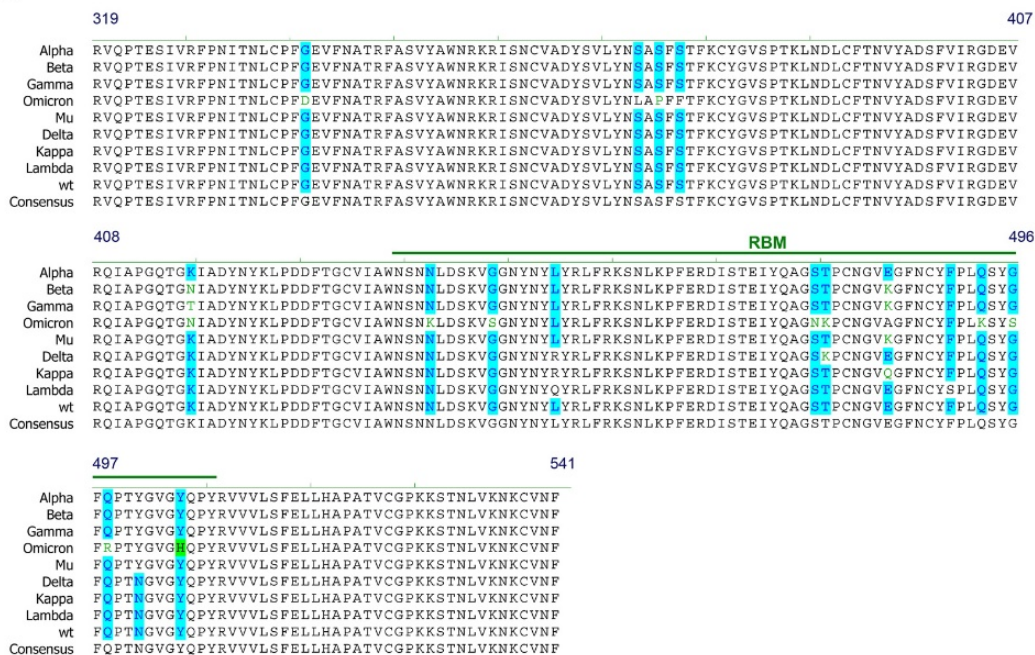

b

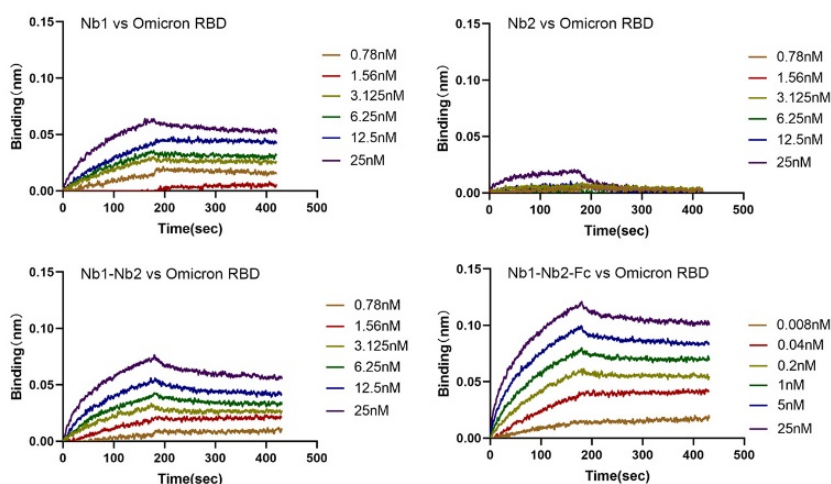

c

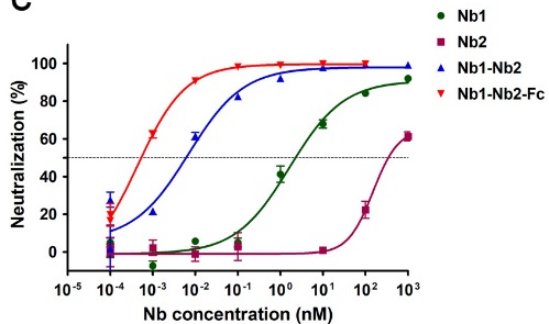

d

|            | Omicron RBD Affinity        |                        |                         | Pseudovirus Neutralization |
|------------|-----------------------------|------------------------|-------------------------|----------------------------|
|            | $K_{on}$ ( $M^{-1}s^{-1}$ ) | $K_{off}$ ( $s^{-1}$ ) | $KD$ (M)                | $IC_{50}$ (nM)             |
| Nb1        | $9.60 \times 10^4$          | $8.73 \times 10^{-5}$  | $9.09 \times 10^{-10}$  | 1.647                      |
| Nb2        | $6.94 \times 10^2$          | $1.86 \times 10^{-2}$  | $2.68 \times 10^{-5}$   | 151.1                      |
| Nb1-Nb2    | $1.37 \times 10^5$          | $3.38 \times 10^{-4}$  | $2.47 \times 10^{-9}$   | 0.0069                     |
| Nb1-Nb2-Fc | $6.87 \times 10^5$          | $< 1.0 \times 10^{-7}$ | $< 1.0 \times 10^{-12}$ | 0.0017                     |

789

790 **Fig. 6 Neutralization of Omicron variant (B.1.1.529).**
